# Supplementary material for: The Mir181ab1 cluster promotes KRAS-driven oncogenesis and progression in lung and pancreas
Source: JCI journal article supplement (doi:10.1172/jci129012), 2019-12-24
Supplement: sd1 [file 1]

# THE MIR181AB1 CLUSTER PROMOTES KRAS-DRIVEN ONCOGENESIS AND PROGRESSION IN LUNG AND PANCREAS

Karmele Valencia, Oihane Erice, Kaja Kostyrko, Simone Hausmann, Elizabeth Guruceaga, Anuradha Tathireddy, Natasha M. Flores, Leanne C. Sayles, Alex G. Lee, Rita Fragoso, Tian-Qiang Sun, Adrian Vallejo, Marta Roman, Rodrigo Entrialgo-Cadierno, Itziar Migueliz, Nerea Razquin, Puri Fortes, Fernando Lecanda, Jun Lu, Mariano Ponz-Sarvisé, Chang-Zheng Chen, Pawel K. Mazur, E. Alejandro Sweet-Cordero, Silvestre Vicent

## SUPPLEMENTARY FIGURES AND LEGENDS

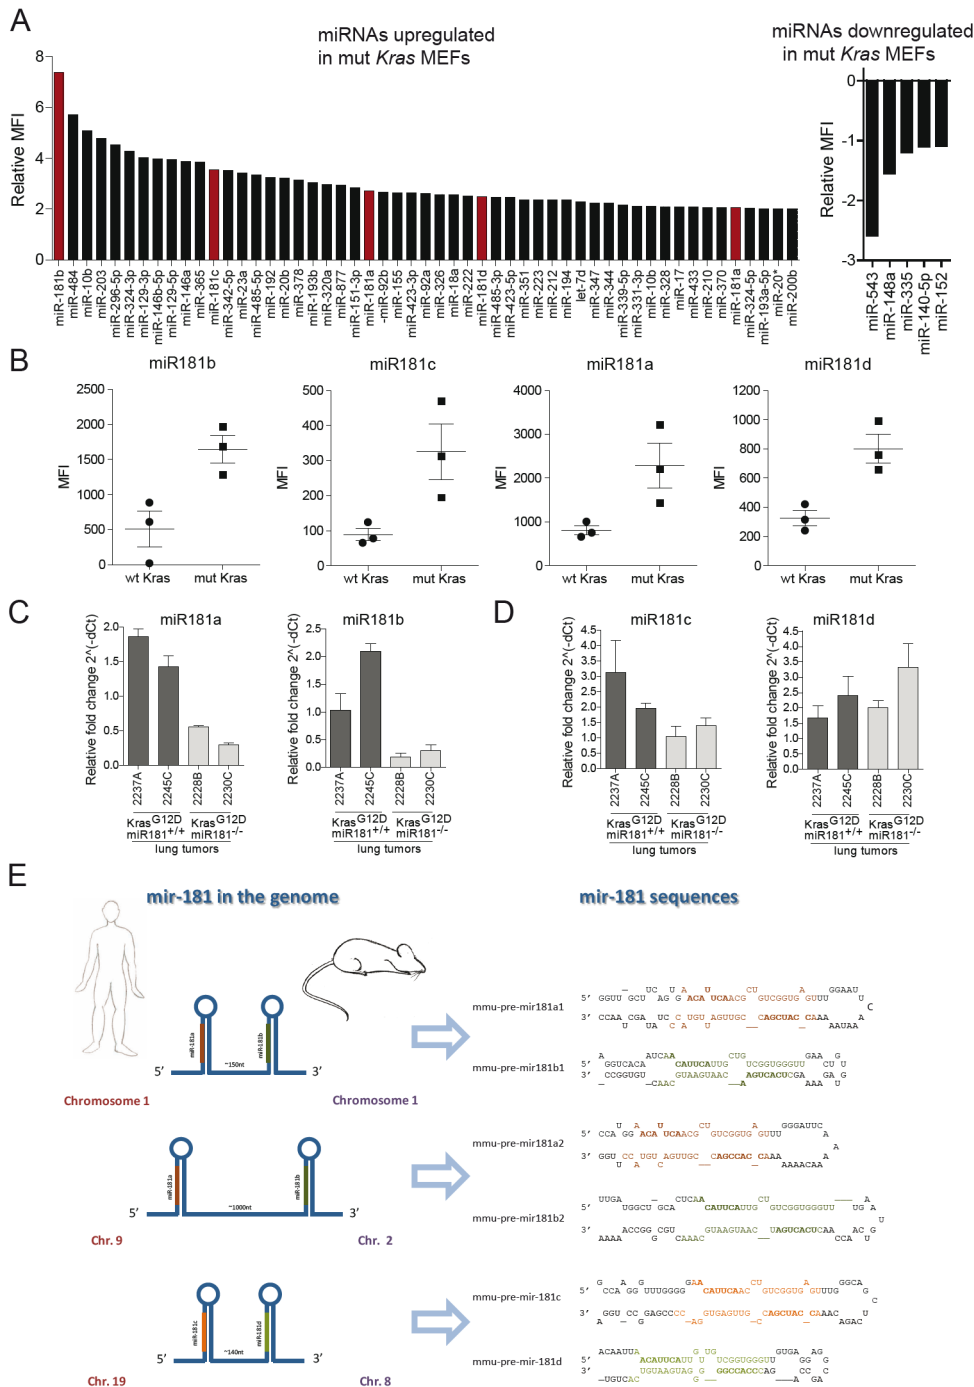

**Suppl. Figure 1 (related to Figure 1).** (A) List of upregulated (left) and downregulated (right) miRNAs upon mutant *Kras* activation in mouse embryo fibroblasts (MEFs) assessed by luminex. Relative MFI (mean fluorescence intensity) is normalized to expression of miRNAs in wild-type MEFs. (B) Absolute MFI expression of the miR181 family members in wild-type and mutant *Kras* MEFs (n=3). (C) Expression of miR181a and miR181b in K181<sup>+/+</sup> and K181<sup>-/-</sup> lung tumors. (D) Expression of miR181c and miR181d in K181<sup>+/+</sup> and K181<sup>-/-</sup> in the same lung tumors as in C. (E) Schematic representation of the three miRNA clusters of the miR181 family in mouse and human (left). Pre-miRNA sequences of mouse miR181 clusters (right). Nucleotide sequence in bold correspond to the seed sequences of the mature miR181 members.

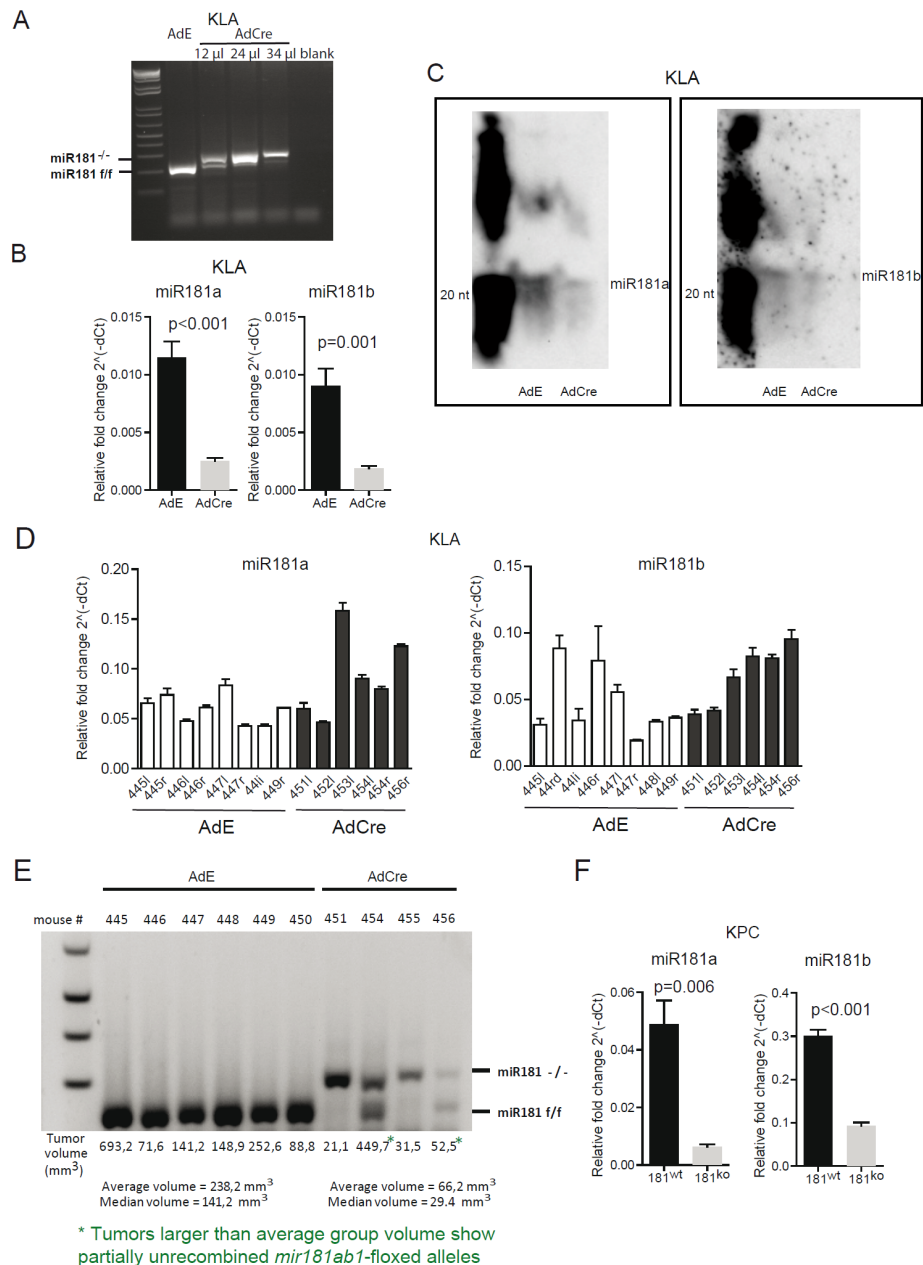

**Suppl. Figure 2 (related to Figure 5).** (A) Genotyping PCR showing the conditions for recombination of the *mir181ab1* floxed alleles in KLA cells. (B) MiR181a and miR181b expression in mouse lung adenocarcinoma *Kras* mutated cells (KLA) treated for 48 h with cre recombinase (adCre) or empty (adE) adenovirus (n=3) compared by *t*-test. (C) Northern blot analysis of RNA samples from the same cells as in B. (D) Quantitative PCR of miR181a and miR181b expression in tumors. (E) Genotyping PCR showing a loss of recombination in tumors from KLA adCre. (F) miR181a and miR181b expression in mouse pancreatic adenocarcinoma (KPC) *Mir181ab1*<sup>+/+</sup> and *Mir181ab1*<sup>f/f</sup> cells (n=3) compared by *t*-test.

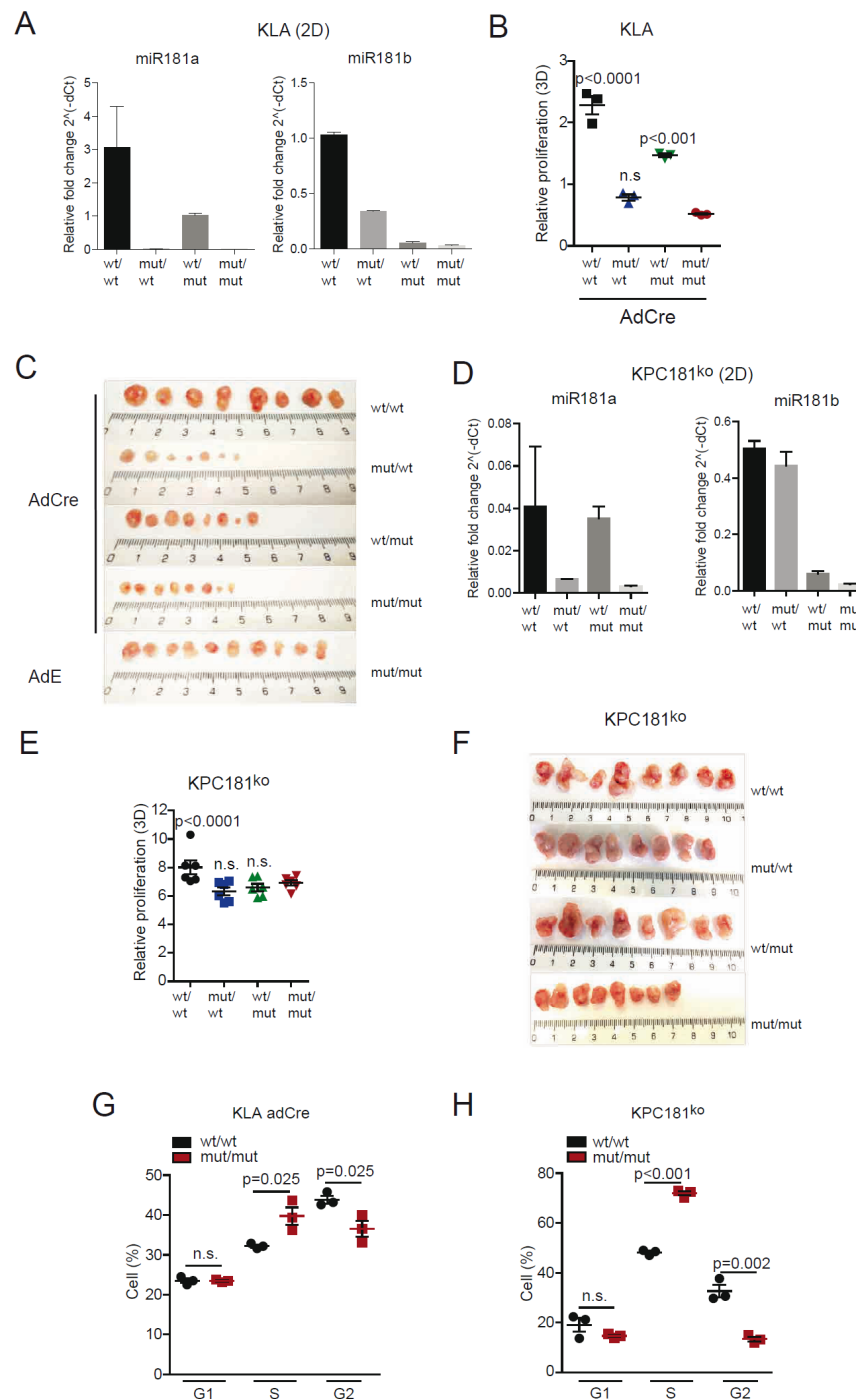

**Suppl. Figure 3 (related to Figure 6).** (A) Quantitative PCR of miR181a and miR181b expression in KLA cells overexpressing exogenous *mir181a1* and *Mir181b1* (wt/wt), *Mir181a1* (wt/mut), *Mir181b1* (mut/wt) or a control sequence (mut/mut) assessed previously to functional assays (n=3). (B) Relative proliferation of KLA organoids transduced with the different miR181 constructs measured by CellTiterGLO at day 3 (n=3) compared by ANOVA. Results are the average of three independent experiments. (C) Tumor images of the different groups described. (D) Quantitative PCR of miR181a and miR181b expression in miR181<sup>ko</sup> pancreatic cancer cells

overexpressing exogenous *Mir181a1* and *Mir181b1* (wt/wt), *Mir181a1* (wt/mut), *Mir181b1* (mut/wt) or a control sequence (mut/mut) assessed previously to functional assays (n=3). (E) Relative proliferation of miR181<sup>ko</sup> pancreatic cancer organoids transduced with the different miR181 constructs measured by CellTiterGLO at day 3 (n=6) compared by ANOVA. (F) Tumor images of the different groups described. (G) Cell cycle distribution assessed with EdU and 7AAD in KLA wt/wt adCre and KLA mut/mut adCre cells 24 h after starving synchronization (n=3). The percentage of cells in each phase is compared by *t*-test. Cell cycle assays are representative of three independent experiments. (H) Cell cycle distribution assessed with EdU and 7AAD in KPC181<sup>ko</sup> wt/wt and mut/mut cells 14h after starving synchronization (n=3). Results are representative of three independent experiments and were compared by *t*-test.

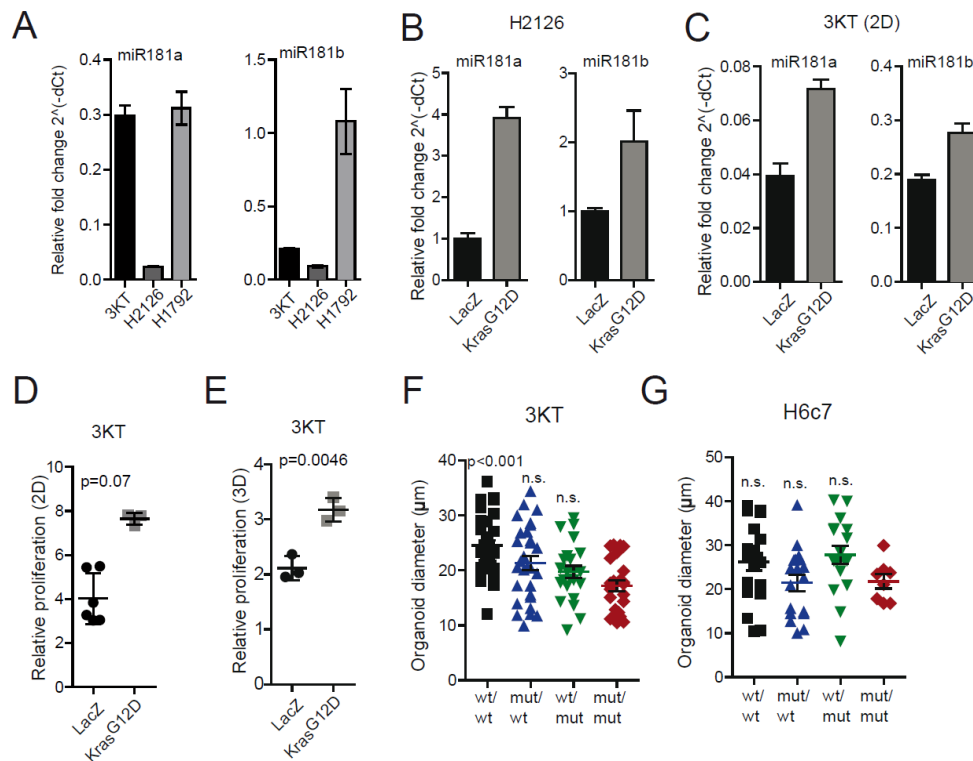

**Suppl. Figure 4 (related to Figure 7).** (A) MiR181a and miR181b expression in human immortalized normal bronchio-epithelial cells (3KT), wild-type (H2126) and mutant (H1792) *KRAS* lung cancer cells (n=3). (B) H2126 expressing control (LacZ) and mutated *KRAS* (G12D) expressing vectors (n=3). (C) MiR181a and miR181b expression in normal human bronchial epithelial immortalized cells 3KT transduced with control (LacZ)- and *KRAS* mutated (G12D)-expressing vectors (n=3). (D) Cell proliferation of 3KT cells expressing control (LacZ) and mutant *KRAS* (G12D) expressing vectors assessed by MTS (n=6) and compared by *t*-test. (E) Relative proliferation of organoids from 3KT control and overexpressing *KRAS*<sup>G12D</sup> measured at day 3 by CellTiterGLO (n=3) and compared by *t*-test. (F and G) Quantification of organoid size from 3KT (F) and H6c7 (G) cells expressing the different *Mir181a1* and *Mir181b1* constructs (n=8-35). Results were compared by ANOVA.

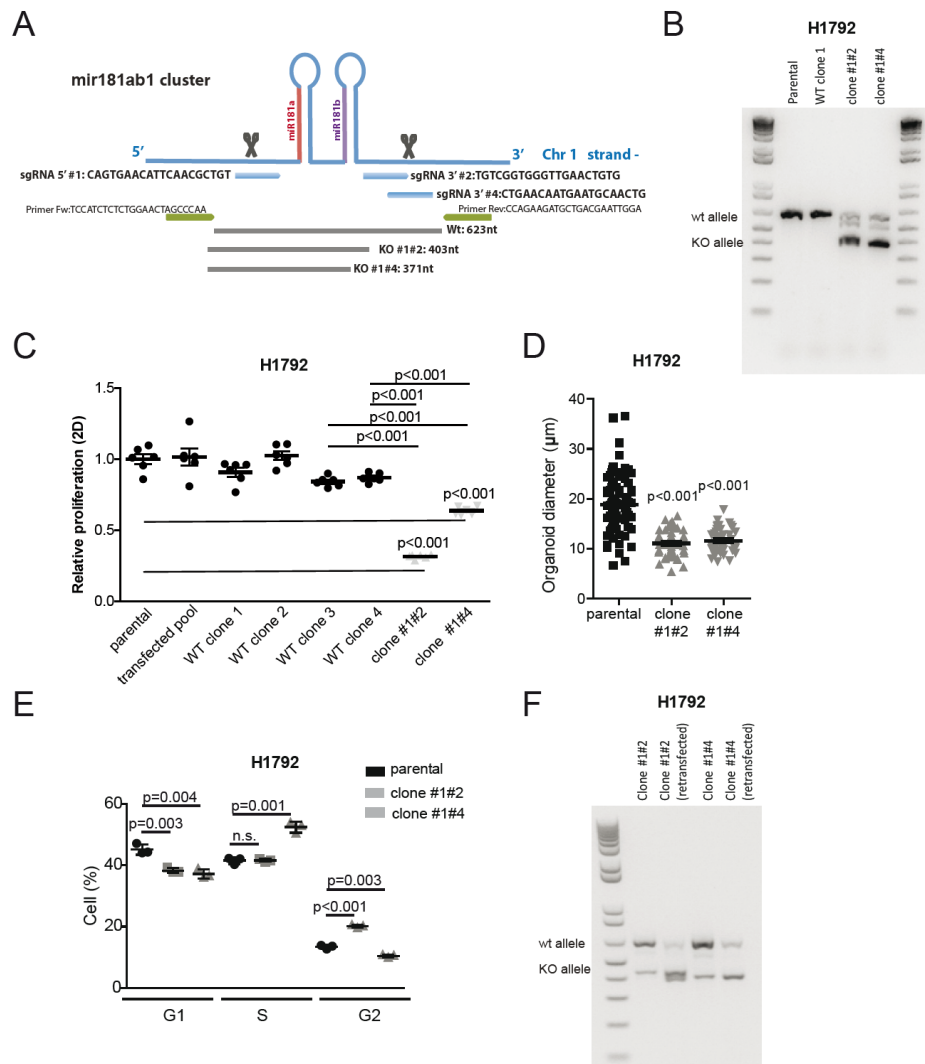

**Suppl. Figure 5 (related to Figure 8).** (A) Schematic representation of the CRISPR/Cas9 strategy designed to knockout the *miR181ab1* cluster from human lung cancer cells expressing mutant *KRAS*. (B) Genotyping PCR of H1792 parental cells, a *mir181ab1* wild-type clone and two *mir181ab1*-CRISPR'ed clones. (C) Cell proliferation analysis assessed by MTS in parental, sgRNA transfected pool cells, wild-type *miR181ab1* (WT) and partially *miR181ab1*-knockedout (KO) cell clones (n=6). Results were compared by ANOVA. (D) Quantification of organoid diameter at day 3 post-seeding in 3D cultures of H1792 *mir181ab1*-CRISPR'ed cells (n=46-90). Results were compared by ANOVA. (E) Cell cycle distribution assessed with EdU and 7AAD in synchronized H1792 control and *mir181ab1*-CRISPR'ed clones 24h after seeding (n=3). Results were compared by *t*-test. (F) Genotyping PCR of H1792 CRISPR'ed clones re-transfected with the same sgRNAs.

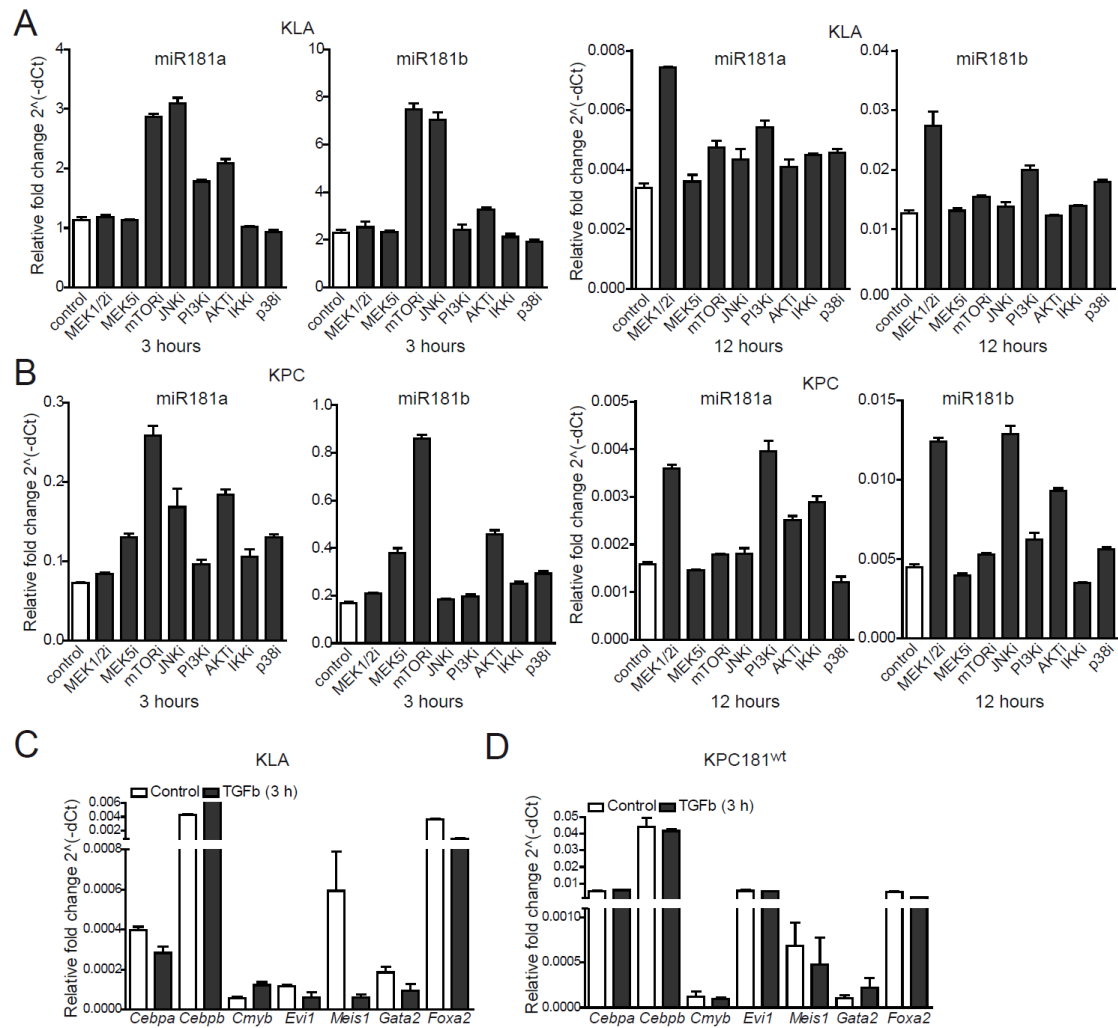

**Suppl. Figure 6 (related to Figure 9).** (A and B) MiR181a and miR181b expression in mouse lung cancer (KLA) and pancreatic cancer (KPC) cells treated with pharmacological inhibitors to the indicated kinases for 3 and 12 h (n=3). MEK1/2i: trametinib (1  $\mu$ M), BIX02189 (MEK5i, 10  $\mu$ M), SP600125 (JNKi, 20  $\mu$ M), GSK2126458 (Pi3Ki, 0.1  $\mu$ M), SB203580 (p38i, 20  $\mu$ M), IKK-16 (IKKi, 1  $\mu$ M), and LY294002 (AKTi, 10  $\mu$ M). (C and D) Quantitative PCR to assess the expression of the indicated transcription factors (TFs) in mouse lung cancer (KLA) and pancreatic cancer (KPC) cells. (n=3). Results were compared by *t*-test. Error bars represent SD.



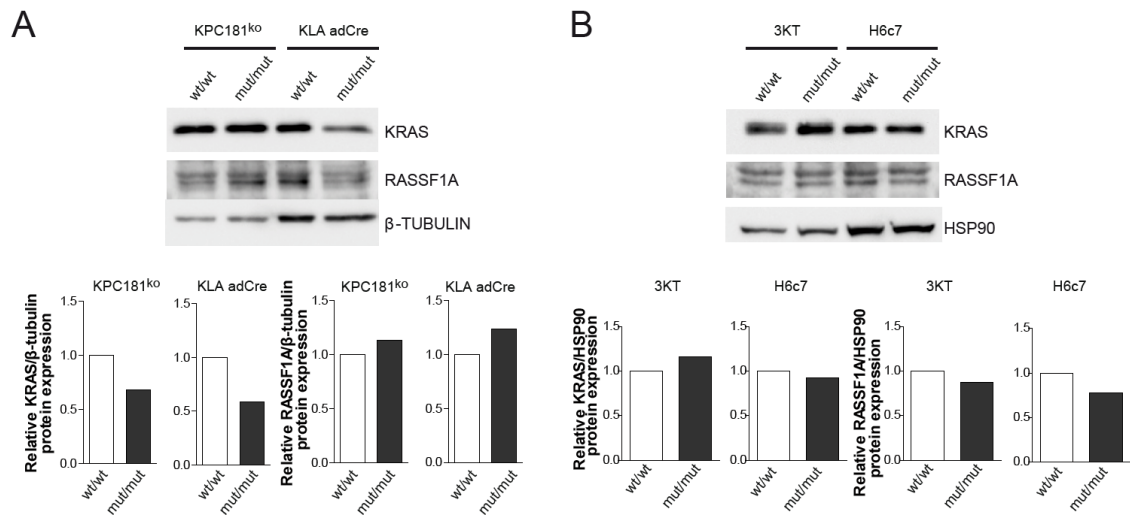

**Suppl. Figure 7 (related to Figure 10).** (A) Representative images by Western blot and densitometry analysis of KRAS and RASSF1A protein expression in miR181ab1-deficient and proficient mouse lung cancer (KLA) and pancreatic cancer (KPC) cells. (B) Representative images by Western blot and densitometry analysis of KRAS and RASSF1A protein expression in human lung (3KT) and pancreas (H6c7) immortalized epithelial cells expressing a control vector (mut/mut) and miR181ab1 (wt/wt). Data are representative of three independent experiments.

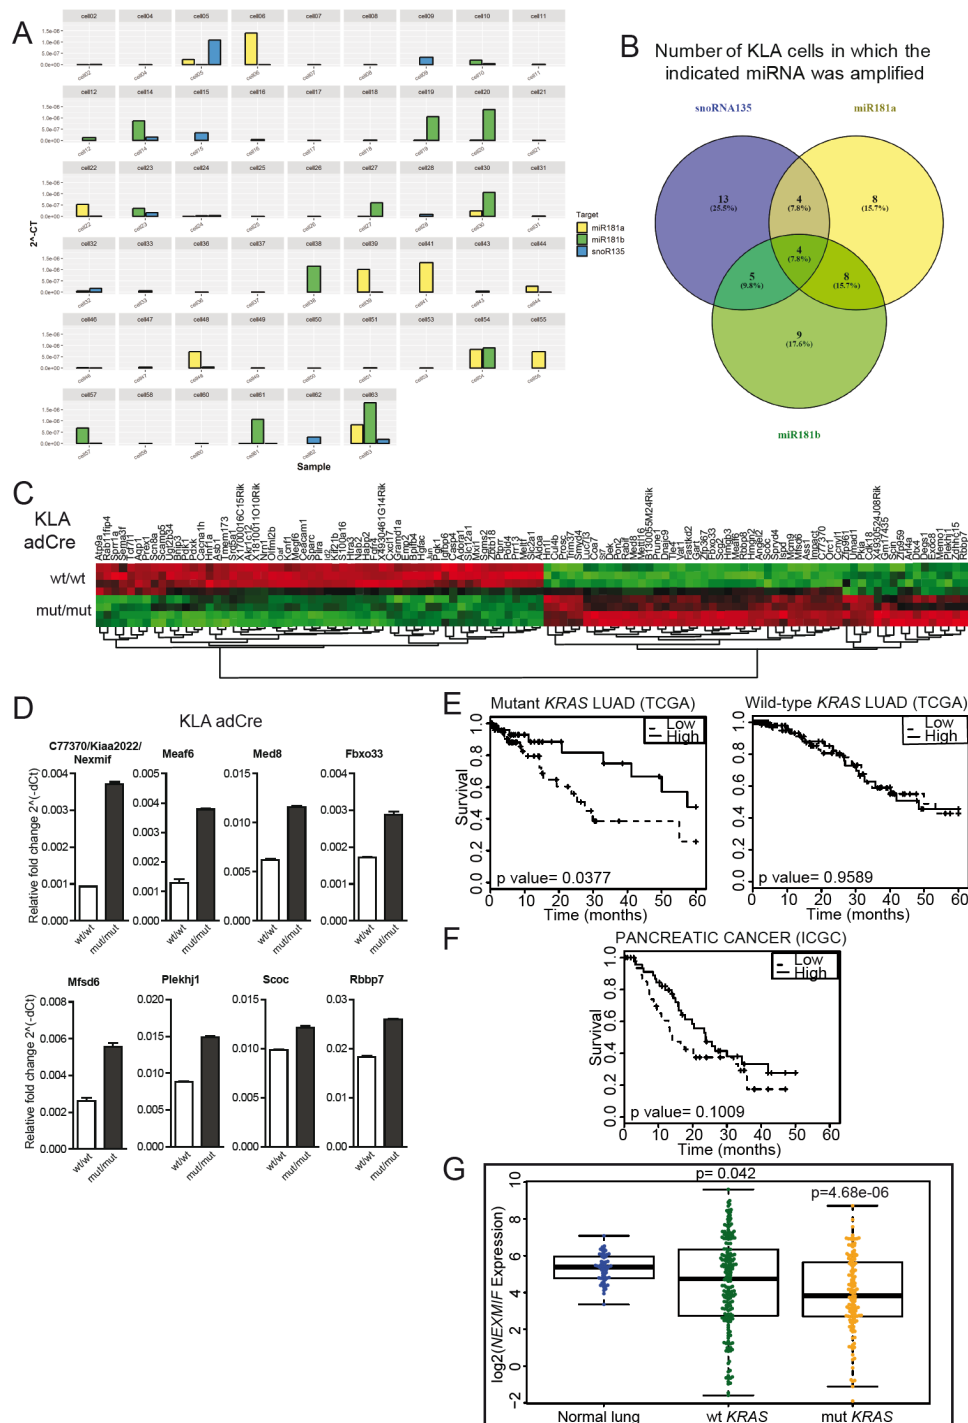

**Suppl. Figure 8 (related to Figure 10).** (A) Fluidigm analysis of single-cell miRNA expression in random cells from a population of mouse *Kras*-driven lung cancer cells (KLA). (B) Venn diagram showing distribution of miR181a, miR181b and snoR135 in the sampled cells analyzed in A. (C) Heat map of differentially expressed genes between KLA wt/wt and mut/mut adCre-treated cells. 54 downregulated (green) and 57 upregulated (red) genes were obtained ( $B > 0$  and  $\log FC / 0.5$ ). (D) Quantitative PCR to quantify mRNA of indicated genes in KLA wt/wt and mut/mut adCre-treated cells. (E) Kaplan–Meier plot of lung adenocarcinoma (LUAD) patients from TCGA stratified

based on the median expression of *NEXMIF* (log-rank test). (F) Kaplan–Meier plot of pancreatic ductal adenocarcinoma (PDAC) patients from ICGC based on the median expression of *NEXMIF* (log-rank test). (G) *NEXMIF* expression levels (log2) in normal lung, wild-type *KRAS* ( $p=0.042$ ,  $FDR=0.0553$ ) and mutant *KRAS* ( $p=4.68e-06$ ,  $FDR=9.79e-06$ ) LUAD patients (Wilcoxon test).

UNCROPPED WESTERN BLOTS

Western blot (whole membrane images) for Suppl. Figure 7A

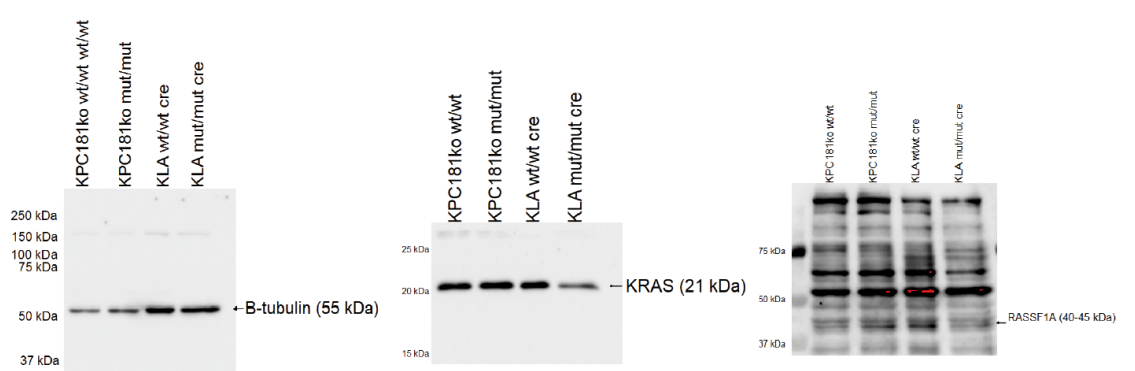

Western blot (whole membrane images) for Suppl. Figure 7B

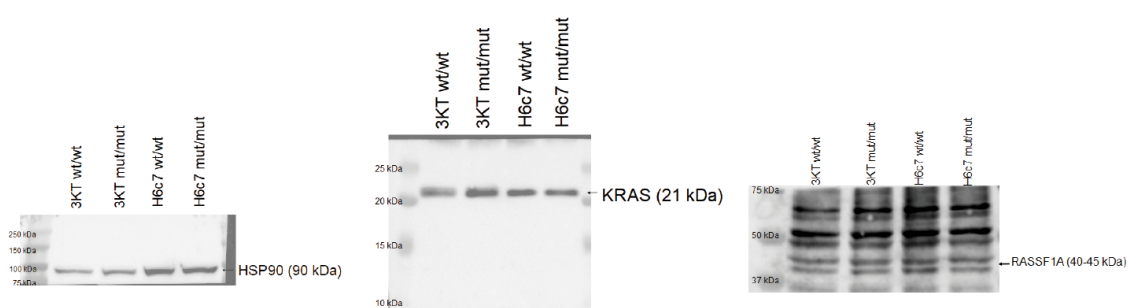

## SUPPLEMENTARY TABLES

| gene     | logFC    | FC       | AveExpr  | t        | P.Value  | adj.P.Val | B        |
|----------|----------|----------|----------|----------|----------|-----------|----------|
| lspd     | -3,10146 | 0,116511 | -0,41965 | -4,80655 | 0,000208 | 0,047047  | 0,853552 |
| X4930524 | -2,79529 | 0,144057 | -0,27335 | -4,582   | 0,000328 | 0,049739  | 0,440899 |
| Scg2     | -2,67912 | 0,156136 | 1,585956 | -5,6484  | 4,01E-05 | 0,030092  | 2,339631 |
| Scin     | -2,47859 | 0,17942  | 0,025837 | -4,43311 | 0,000444 | 0,052313  | 0,164182 |
| C77370   | -2,37216 | 0,193156 | 4,683384 | -4,44096 | 0,000437 | 0,052313  | 0,178832 |
| Zdhhc15  | -2,29238 | 0,204139 | -0,04238 | -5,28315 | 8,11E-05 | 0,038922  | 1,707624 |
| Orc1     | -1,91304 | 0,265533 | 3,710747 | -5,02922 | 0,000134 | 0,042177  | 1,256488 |
| Pkia     | -1,64571 | 0,319589 | 1,259976 | -6,19879 | 1,44E-05 | 0,017246  | 3,251729 |
| Meaf6    | -1,55303 | 0,340793 | 3,748044 | -4,41107 | 0,000464 | 0,053215  | 0,123034 |
| Mettl16  | -1,52936 | 0,346432 | 5,290169 | -6,05216 | 1,88E-05 | 0,020096  | 3,013591 |
| B130055M | -1,47699 | 0,359236 | 0,533247 | -5,06922 | 0,000123 | 0,042177  | 1,328153 |
| Gm17435  | -1,40986 | 0,376347 | 0,086544 | -4,5971  | 0,000318 | 0,049739  | 0,468834 |
| Zfp959   | -1,29776 | 0,406756 | 2,324033 | -4,54654 | 0,000352 | 0,049739  | 0,375221 |
| Dek      | -1,28982 | 0,409001 | 7,404103 | -4,97334 | 0,000149 | 0,042343  | 1,155982 |
| Hmgn2    | -1,25007 | 0,420428 | 6,597047 | -5,03284 | 0,000133 | 0,042177  | 1,262976 |
| Coa7     | -1,23417 | 0,425087 | 3,266092 | -4,74294 | 0,000237 | 0,047313  | 0,737272 |
| Ass1     | -1,22527 | 0,427717 | 3,765744 | -4,84434 | 0,000193 | 0,047047  | 0,922385 |
| Impact   | -1,21794 | 0,429895 | 5,0545   | -4,61101 | 0,000309 | 0,049739  | 0,494552 |
| Mcm9     | -1,10185 | 0,465919 | 2,986358 | -4,97561 | 0,000149 | 0,042343  | 1,160079 |
| Zfp367   | -1,02719 | 0,490664 | 5,675561 | -4,48208 | 0,000401 | 0,052313  | 0,255448 |
| St7      | -1,02585 | 0,49112  | 4,075827 | -4,54645 | 0,000352 | 0,049739  | 0,375046 |
| Dnajc9   | -1,00372 | 0,498711 | 6,504155 | -4,55952 | 0,000343 | 0,049739  | 0,399272 |
| Fbxo33   | -0,99743 | 0,500893 | 4,830301 | -4,97881 | 0,000148 | 0,042343  | 1,165846 |
| Hmgb3    | -0,94431 | 0,519679 | 5,912464 | -4,53033 | 0,000364 | 0,050431  | 0,345134 |
| Zfp961   | -0,91076 | 0,531903 | 3,660411 | -4,9228  | 0,000165 | 0,043152  | 1,064722 |
| Vat1     | -0,9071  | 0,533255 | 7,80361  | -6,35087 | 1,09E-05 | 0,016351  | 3,494926 |
| Tle4     | -0,9015  | 0,535331 | 5,024941 | -5,30365 | 7,79E-05 | 0,038922  | 1,743643 |
| Mfsd6    | -0,89103 | 0,539228 | 5,100302 | -4,92156 | 0,000165 | 0,043152  | 1,062492 |
| Fastkd2  | -0,88615 | 0,541054 | 5,3302   | -5,61051 | 4,31E-05 | 0,030442  | 2,275033 |
| Plekhj1  | -0,87504 | 0,545241 | 5,025659 | -4,54603 | 0,000352 | 0,049739  | 0,374266 |
| Rbbp8    | -0,87219 | 0,546317 | 4,996987 | -4,40833 | 0,000467 | 0,053215  | 0,117907 |
| Trim37   | -0,85708 | 0,552068 | 5,353267 | -5,17456 | 0,0001   | 0,039882  | 1,515839 |
| Prune1   | -0,83134 | 0,562009 | 6,132979 | -4,81053 | 0,000207 | 0,047047  | 0,860804 |
| Angel2   | -0,82697 | 0,563713 | 5,583424 | -4,77634 | 0,000221 | 0,047047  | 0,798383 |
| Ccnyl1   | -0,82008 | 0,566411 | 5,322535 | -4,38794 | 0,000487 | 0,053546  | 0,079795 |
| Exoc8    | -0,81528 | 0,568297 | 4,710066 | -4,39015 | 0,000484 | 0,053546  | 0,083933 |
| Med8     | -0,80048 | 0,574157 | 4,928365 | -4,66307 | 0,000278 | 0,049739  | 0,590577 |
| Arl4a    | -0,79701 | 0,575542 | 5,026207 | -4,52017 | 0,000371 | 0,050637  | 0,326275 |
| Luc7l3   | -0,79307 | 0,577115 | 6,57277  | -4,41158 | 0,000464 | 0,053215  | 0,123985 |
| Smyd4    | -0,73389 | 0,60128  | 3,801294 | -4,45035 | 0,000428 | 0,052313  | 0,196341 |
| Prosc    | -0,72132 | 0,606543 | 5,546202 | -4,82995 | 0,000199 | 0,047047  | 0,896192 |
| Degs1    | -0,70931 | 0,611612 | 6,764142 | -4,46359 | 0,000417 | 0,052313  | 0,221016 |
| Hn1l     | -0,70655 | 0,612786 | 6,999164 | -5,12533 | 0,000111 | 0,040172  | 1,428321 |
| Scoc     | -0,70106 | 0,615121 | 5,12228  | -4,60638 | 0,000312 | 0,049739  | 0,485992 |
| Memo1    | -0,70021 | 0,615483 | 6,053818 | -5,00551 | 0,00014  | 0,042343  | 1,213886 |
| Pon2     | -0,68483 | 0,622081 | 6,377909 | -4,52779 | 0,000366 | 0,050431  | 0,340431 |

|           |          |          |          |          |          |          |          |
|-----------|----------|----------|----------|----------|----------|----------|----------|
| Rbbp7     | -0,67993 | 0,624194 | 8,025247 | -4,44656 | 0,000432 | 0,052313 | 0,189287 |
| Umad1     | -0,66965 | 0,628661 | 3,325217 | -4,64605 | 0,000288 | 0,049739 | 0,559205 |
| Spryd4    | -0,65892 | 0,633351 | 4,171991 | -5,45977 | 5,76E-05 | 0,033015 | 2,015807 |
| Dtx4      | -0,65304 | 0,635939 | 5,583794 | -4,36237 | 0,000513 | 0,055408 | 0,031941 |
| Cdk18     | -0,64167 | 0,640971 | 7,655402 | -4,62489 | 0,0003   | 0,049739 | 0,520179 |
| Rabif     | -0,63058 | 0,645915 | 5,590508 | -4,69256 | 0,000262 | 0,049739 | 0,644825 |
| Gart      | -0,62185 | 0,649839 | 7,10351  | -4,43774 | 0,000439 | 0,052313 | 0,172827 |
| Cul4b     | -0,57708 | 0,670321 | 5,628627 | -4,46174 | 0,000418 | 0,052313 | 0,217582 |
| Scn8a     | 0,606456 | 1,522514 | 6,351055 | 4,770046 | 0,000224 | 0,047047 | 0,786878 |
| Gramd1a   | 0,63886  | 1,557098 | 4,868252 | 4,354468 | 0,000521 | 0,05581  | 0,017133 |
| Prr13     | 0,776539 | 1,713016 | 7,687826 | 4,573604 | 0,000333 | 0,049739 | 0,425366 |
| Pgk1      | 0,786319 | 1,724668 | 9,79188  | 4,694852 | 0,000261 | 0,049739 | 0,649034 |
| Mxi1      | 0,789816 | 1,728854 | 6,609015 | 4,670091 | 0,000274 | 0,049739 | 0,603494 |
| Hgfac     | 0,822607 | 1,768598 | 6,566403 | 5,467961 | 5,67E-05 | 0,033015 | 2,029986 |
| Emp2      | 0,824061 | 1,770382 | 6,249991 | 5,913054 | 2,44E-05 | 0,020884 | 2,784397 |
| Ugt2b34   | 0,83256  | 1,780842 | 6,442683 | 5,195765 | 9,62E-05 | 0,039882 | 1,553424 |
| Aldoa     | 0,847573 | 1,799471 | 10,79633 | 4,404618 | 0,00047  | 0,053215 | 0,11098  |
| Spr1a     | 0,895205 | 1,859874 | 8,928798 | 4,797242 | 0,000212 | 0,047047 | 0,836562 |
| Asb1      | 0,908244 | 1,87676  | 4,877766 | 6,000144 | 2,07E-05 | 0,020096 | 2,928263 |
| Pilra     | 0,915094 | 1,885692 | 5,098882 | 5,433881 | 6,06E-05 | 0,033015 | 1,970932 |
| Slc2a1    | 0,927149 | 1,901514 | 8,08264  | 5,436644 | 6,02E-05 | 0,033015 | 1,975727 |
| Zbtb18    | 0,954668 | 1,938134 | 6,742048 | 4,947963 | 0,000157 | 0,042803 | 1,110205 |
| Sgms2     | 0,96712  | 1,954934 | 6,61472  | 4,569046 | 0,000336 | 0,049739 | 0,416925 |
| Pold4     | 1,002802 | 2,003888 | 5,251565 | 4,456156 | 0,000423 | 0,052313 | 0,20717  |
| Kcnf1     | 1,018149 | 2,025318 | 3,911607 | 5,179162 | 9,94E-05 | 0,039882 | 1,523999 |
| Akr1c12   | 1,02429  | 2,033959 | 6,223321 | 4,964953 | 0,000152 | 0,042343 | 1,140865 |
| Oaf       | 1,044766 | 2,063032 | 5,60039  | 4,437007 | 0,00044  | 0,052313 | 0,171461 |
| Hnf1a     | 1,051553 | 2,07276  | 4,022211 | 4,497869 | 0,000389 | 0,051812 | 0,28483  |
| Tcf7l1    | 1,078937 | 2,112479 | 2,655266 | 6,480931 | 8,63E-06 | 0,014791 | 3,699834 |
| Rab11fip4 | 1,099549 | 2,142877 | 1,449759 | 4,745793 | 0,000235 | 0,047313 | 0,742492 |
| Nab2      | 1,120337 | 2,173977 | 4,094699 | 4,856319 | 0,000189 | 0,047047 | 0,944171 |
| Srd5a1    | 1,189146 | 2,280177 | 6,537646 | 4,627858 | 0,000299 | 0,049739 | 0,525656 |
| Megf6     | 1,213756 | 2,319407 | 4,262092 | 4,622675 | 0,000302 | 0,049739 | 0,51609  |
| S100a16   | 1,226401 | 2,339825 | 5,71018  | 6,510321 | 8,19E-06 | 0,014791 | 3,745747 |
| Pdxk      | 1,244048 | 2,368622 | 5,972191 | 5,33091  | 7,39E-05 | 0,03855  | 1,791427 |
| Sema3f    | 1,257104 | 2,390155 | 1,2939   | 4,610349 | 0,000309 | 0,049739 | 0,493326 |
| Ptprr     | 1,355383 | 2,558651 | 4,519278 | 4,436271 | 0,000441 | 0,052313 | 0,170087 |
| Olfml2b   | 1,389588 | 2,620038 | 4,257446 | 5,57626  | 4,61E-05 | 0,030694 | 2,216447 |
| Tmem173   | 1,412653 | 2,662262 | 3,209941 | 4,431792 | 0,000445 | 0,052313 | 0,16173  |
| X1700016  | 1,414851 | 2,666322 | 5,495634 | 4,393369 | 0,000481 | 0,053546 | 0,08995  |
| Sparc     | 1,442207 | 2,717363 | 4,418904 | 6,859513 | 4,43E-06 | 0,010622 | 4,280165 |
| Pdk1      | 1,465118 | 2,76086  | 7,048361 | 4,762603 | 0,000227 | 0,047047 | 0,773265 |
| X1810011  | 1,478667 | 2,78691  | 6,016246 | 4,800241 | 0,000211 | 0,047047 | 0,842036 |
| Scamp5    | 1,494028 | 2,816743 | 4,073673 | 4,505942 | 0,000382 | 0,05154  | 0,299841 |
| Atp9a     | 1,6875   | 3,22098  | 2,698747 | 7,360225 | 1,89E-06 | 0,005658 | 5,011047 |
| Habp2     | 1,688717 | 3,223698 | 4,737472 | 4,37871  | 0,000496 | 0,054072 | 0,062526 |
| Aqp1      | 1,800169 | 3,48261  | 5,952625 | 11,4036  | 5,75E-09 | 6,89E-05 | 9,561512 |



|          |          |          |          |          |          |          |          |
|----------|----------|----------|----------|----------|----------|----------|----------|
| Id2      | 1,826761 | 3,547397 | 7,271218 | 5,0503   | 0,000128 | 0,042177 | 1,294284 |
| Prex1    | 1,869828 | 3,654891 | 3,023384 | 7,914123 | 7,63E-07 | 0,003052 | 5,771985 |
| Fgfr4    | 1,933544 | 3,819923 | 1,974413 | 4,836887 | 0,000196 | 0,047047 | 0,908824 |
| Casp4    | 1,948298 | 3,859189 | 0,293205 | 4,598594 | 0,000317 | 0,049739 | 0,471602 |
| Jun      | 1,984095 | 3,956144 | 6,306516 | 5,228992 | 9,02E-05 | 0,039882 | 1,61219  |
| Ceacam1  | 2,096591 | 4,276975 | 4,673001 | 8,919302 | 1,63E-07 | 0,000977 | 7,031675 |
| Bnip3    | 2,09761  | 4,279997 | 6,22594  | 4,565669 | 0,000339 | 0,049739 | 0,410672 |
| Cxcl17   | 2,24996  | 4,756697 | 1,877485 | 4,595841 | 0,000319 | 0,049739 | 0,466512 |
| Nrn1     | 2,297109 | 4,91472  | 4,72136  | 4,577876 | 0,00033  | 0,049739 | 0,433276 |
| Igfbp6   | 2,380637 | 5,207665 | 0,290894 | 5,165655 | 0,000102 | 0,039882 | 1,500031 |
| Slc12a1  | 2,413917 | 5,329192 | 0,539988 | 6,221708 | 1,38E-05 | 0,017246 | 3,288619 |
| Kif21b   | 2,455724 | 5,485884 | 4,006403 | 4,632433 | 0,000296 | 0,049739 | 0,534098 |
| Bpifb4   | 2,510285 | 5,697327 | 3,4668   | 5,850447 | 2,74E-05 | 0,021915 | 2,680208 |
| Htra3    | 2,517527 | 5,725996 | 2,817592 | 5,158651 | 0,000104 | 0,039882 | 1,487594 |
| Cacna1h  | 3,174446 | 9,02825  | 2,545854 | 5,070118 | 0,000123 | 0,042177 | 1,329765 |
| Melft    | 3,356229 | 10,24061 | 0,811115 | 5,144642 | 0,000106 | 0,039882 | 1,462693 |
| Adora1   | 3,545069 | 11,67272 | 0,445084 | 4,781687 | 0,000219 | 0,047047 | 0,808156 |
| X4930461 | 3,653351 | 12,58253 | 0,353665 | 4,672264 | 0,000273 | 0,049739 | 0,607494 |

**Suppl. Table 1 (related to Figure 10).** Differentially expressed genes in KLA cells (B>0, logFC 0.5)

| Collection(s):                          | MIR                     |                        |        |          |             |
|-----------------------------------------|-------------------------|------------------------|--------|----------|-------------|
| # overlaps shown:                       | 10                      |                        |        |          |             |
| # genesets in collections:              | 221                     |                        |        |          |             |
| # genes in comparison (n):              | 43                      |                        |        |          |             |
| # genes in universe (N):                | 45956                   |                        |        |          |             |
| Gene Set Name                           | # Genes in Gene Set (K) | # Genes in Overlap (k) | k/K    | p-value  | FDR q-value |
| TGAATGT_MIR181A_MIR181B_MIR181C_MIR181D | 484                     | 8                      | 0,0165 | 1,50E-08 | 3,31E-06    |
| AGCATT_MIR155                           | 134                     | 4                      | 0,0299 | 7,81E-06 | 6,96E-04    |
| GTGCCA_MIR96                            | 303                     | 5                      | 0,0165 | 9,45E-06 | 6,96E-04    |
| CAGTATT_MIR200B_MIR200C_MIR429          | 469                     | 5                      | 0,0107 | 7,58E-05 | 4,19E-03    |
| AACATTC_MIR4093P                        | 142                     | 3                      | 0,0211 | 3,26E-04 | 1,44E-02    |
| ACTGTGA_MIR27A_MIR27B                   | 474                     | 4                      | 0,0084 | 1,00E-03 | 3,69E-02    |
| CCCACAT_MIR2993P                        | 54                      | 2                      | 0,037  | 1,19E-03 | 3,75E-02    |
| CACTTTG_MIR520G_MIR520H                 | 237                     | 3                      | 0,0127 | 1,44E-03 | 3,79E-02    |
| ATGTTAA_MIR302C                         | 243                     | 3                      | 0,0123 | 1,54E-03 | 3,79E-02    |
| CAAGGAT_MIR362                          | 66                      | 2                      | 0,0303 | 1,77E-03 | 3,90E-02    |
| v7.1 miRBase                            |                         |                        |        |          |             |

**Suppl. Table 2 (related to Figure 10).** MSigDB analysis for miRNAs predicted to bind the seed sequence of genes in the downregulated list obtained from *Mir181ab1*-knockout cells reconstituted with exogenous expression of miR181ab1.

| Gene    | Associated_Gi | miRNA        | name            | pred_DBs | val_DBs | TsCons | TSNCons | MicroCosm | miRanda_sc | miRanda_s | miRanda_c | miRanda | PicTar_mcf | PicTar_mc | PicTar_m | PITA | Seed | miRTarbase | miRecords | Tarbase |
|---------|---------------|--------------|-----------------|----------|---------|--------|---------|-----------|------------|-----------|-----------|---------|------------|-----------|----------|------|------|------------|-----------|---------|
| ENSG000 | ANGEL2        | MIMAT0000256 | hsa-miR-181a-5p | 1        | 0       | 0      | 0       | 0         | 0          | 0         | 1         | 0       | 0          | 0         | 0        | 0    | 0    | 0          | 0         | 0       |
| ENSG000 | ANGEL2        | MIMAT0000257 | hsa-miR-181b-5p | 1        | 0       | 0      | 0       | 0         | 0          | 0         | 1         | 0       | 0          | 0         | 0        | 0    | 0    | 0          | 0         | 0       |
| ENSG000 | ARL4A         | MIMAT0000270 | hsa-miR-181a-3p | 2        | 0       | 0      | 0       | 0         | 0          | 0         | 1         | 0       | 0          | 0         | 0        | 0    | 0    | 0          | 0         | 0       |
| ENSG000 | ARL4A         | MIMAT0000256 | hsa-miR-181a-5p | 1        | 0       | 0      | 0       | 0         | 0          | 0         | 1         | 0       | 0          | 0         | 0        | 0    | 0    | 0          | 0         | 0       |
| ENSG000 | ARL4A         | MIMAT0000257 | hsa-miR-181b-5p | 1        | 0       | 0      | 0       | 0         | 0          | 0         | 1         | 0       | 0          | 0         | 0        | 0    | 0    | 0          | 0         | 0       |
| ENSG000 | CCNYL1        | MIMAT0000256 | hsa-miR-181a-5p | 1        | 0       | 0      | 0       | 0         | 0          | 0         | 1         | 0       | 0          | 0         | 0        | 0    | 0    | 0          | 0         | 0       |
| ENSG000 | CCNYL1        | MIMAT0022692 | hsa-miR-181b-3p | 1        | 0       | 0      | 0       | 0         | 0          | 0         | 0         | 0       | 0          | 0         | 0        | 0    | 1    | 0          | 0         | 0       |
| ENSG000 | CCNYL1        | MIMAT0000257 | hsa-miR-181b-5p | 1        | 0       | 0      | 0       | 0         | 0          | 0         | 0         | 0       | 0          | 0         | 0        | 0    | 1    | 0          | 0         | 0       |
| ENSG000 | CUL4B         | MIMAT0000256 | hsa-miR-181a-5p | 2        | 0       | 0      | 0       | 0         | 1          | 0         | 1         | 0       | 0          | 0         | 0        | 0    | 0    | 0          | 0         | 0       |
| ENSG000 | CUL4B         | MIMAT0000257 | hsa-miR-181b-5p | 2        | 0       | 0      | 0       | 0         | 1          | 0         | 1         | 0       | 0          | 0         | 0        | 0    | 0    | 0          | 0         | 0       |
| ENSG000 | DEK           | MIMAT0000256 | hsa-miR-181a-5p | 4        | 0       | 0      | 0       | 0         | 1          | 0         | 1         | 0       | 0          | 0         | 1        | 0    | 1    | 0          | 0         | 0       |
| ENSG000 | DEK           | MIMAT0022692 | hsa-miR-181b-3p | 1        | 0       | 0      | 0       | 0         | 0          | 0         | 0         | 0       | 0          | 0         | 0        | 0    | 1    | 0          | 0         | 0       |
| ENSG000 | DEK           | MIMAT0000257 | hsa-miR-181b-5p | 4        | 0       | 0      | 0       | 0         | 1          | 0         | 1         | 0       | 0          | 0         | 1        | 0    | 1    | 0          | 0         | 0       |
| ENSG000 | DTX4          | MIMAT0000256 | hsa-miR-181a-5p | 4        | 0       | 0      | 0       | 0         | 0          | 0         | 1         | 0       | 0          | 0         | 1        | 1    | 1    | 0          | 0         | 0       |
| ENSG000 | DTX4          | MIMAT0022692 | hsa-miR-181b-3p | 1        | 0       | 0      | 0       | 0         | 0          | 0         | 0         | 0       | 0          | 0         | 0        | 0    | 1    | 0          | 0         | 0       |
| ENSG000 | DTX4          | MIMAT0000257 | hsa-miR-181b-5p | 4        | 0       | 0      | 0       | 0         | 0          | 0         | 1         | 0       | 0          | 0         | 1        | 1    | 1    | 0          | 0         | 0       |
| ENSG000 | EXOC8         | MIMAT0000256 | hsa-miR-181a-5p | 2        | 0       | 0      | 0       | 0         | 1          | 0         | 0         | 0       | 0          | 0         | 0        | 0    | 1    | 0          | 0         | 0       |
| ENSG000 | EXOC8         | MIMAT0000257 | hsa-miR-181b-5p | 2        | 0       | 0      | 0       | 0         | 1          | 0         | 0         | 0       | 0          | 0         | 0        | 0    | 1    | 0          | 0         | 0       |
| ENSG000 | FASTKD2       | MIMAT0000256 | hsa-miR-181a-5p | 1        | 0       | 0      | 0       | 0         | 0          | 0         | 1         | 0       | 0          | 0         | 0        | 0    | 0    | 0          | 0         | 0       |
| ENSG000 | FASTKD2       | MIMAT0000257 | hsa-miR-181b-5p | 1        | 0       | 0      | 0       | 0         | 0          | 0         | 1         | 0       | 0          | 0         | 0        | 0    | 0    | 0          | 0         | 0       |
| ENSG000 | FBXO33        | MIMAT0000256 | hsa-miR-181a-5p | 6        | 1       | 0      | 0       | 0         | 1          | 0         | 1         | 0       | 0          | 1         | 1        | 1    | 1    | 0          | 0         | 1       |
| ENSG000 | FBXO33        | MIMAT0000257 | hsa-miR-181b-5p | 6        | 0       | 0      | 0       | 0         | 1          | 0         | 1         | 0       | 0          | 1         | 1        | 1    | 1    | 0          | 0         | 0       |
| ENSG000 | HMG83         | MIMAT0000256 | hsa-miR-181a-5p | 2        | 0       | 0      | 0       | 0         | 0          | 0         | 1         | 0       | 0          | 0         | 0        | 0    | 1    | 0          | 0         | 0       |
| ENSG000 | HMG83         | MIMAT0000256 | hsa-miR-181a-5p | 2        | 0       | 0      | 0       | 0         | 0          | 0         | 1         | 0       | 0          | 0         | 0        | 0    | 1    | 0          | 0         | 0       |
| ENSG000 | HMG83         | MIMAT0000257 | hsa-miR-181b-5p | 2        | 0       | 0      | 0       | 0         | 0          | 0         | 1         | 0       | 0          | 0         | 0        | 0    | 1    | 0          | 0         | 0       |
| ENSG000 | HMG83         | MIMAT0000257 | hsa-miR-181b-5p | 2        | 0       | 0      | 0       | 0         | 0          | 0         | 1         | 0       | 0          | 0         | 0        | 0    | 1    | 0          | 0         | 0       |
| ENSG000 | HMG2          | MIMAT0000256 | hsa-miR-181a-5p | 2        | 0       | 0      | 0       | 0         | 1          | 0         | 1         | 0       | 0          | 0         | 0        | 0    | 0    | 0          | 0         | 0       |
| ENSG000 | HMG2          | MIMAT0000257 | hsa-miR-181b-5p | 1        | 0       | 0      | 0       | 0         | 1          | 0         | 0         | 0       | 0          | 0         | 0        | 0    | 0    | 0          | 0         | 0       |
| ENSG000 | ISP0          | MIMAT0000270 | hsa-miR-181a-3p | 1        | 0       | 0      | 0       | 0         | 0          | 0         | 0         | 1       | 0          | 0         | 0        | 0    | 0    | 0          | 0         | 0       |
| ENSG000 | ISP0          | MIMAT0000256 | hsa-miR-181a-5p | 2        | 0       | 0      | 0       | 0         | 1          | 0         | 1         | 0       | 0          | 0         | 0        | 0    | 0    | 0          | 0         | 0       |
| ENSG000 | ISP0          | MIMAT0000257 | hsa-miR-181b-5p | 2        | 0       | 0      | 0       | 0         | 1          | 0         | 1         | 0       | 0          | 0         | 0        | 0    | 0    | 0          | 0         | 0       |
| ENSG000 | KIAA2022      | MIMAT0000256 | hsa-miR-181a-5p | 5        | 0       | 0      | 0       | 0         | 1          | 0         | 0         | 0       | 0          | 1         | 1        | 1    | 1    | 0          | 0         | 0       |
| ENSG000 | KIAA2022      | MIMAT0000257 | hsa-miR-181b-5p | 5        | 0       | 0      | 0       | 0         | 1          | 0         | 0         | 0       | 0          | 1         | 1        | 1    | 1    | 0          | 0         | 0       |
| ENSG000 | LUC7L3        | MIMAT0000256 | hsa-miR-181a-5p | 1        | 0       | 0      | 0       | 0         | 1          | 0         | 0         | 0       | 0          | 0         | 0        | 0    | 0    | 0          | 0         | 0       |
| ENSG000 | LUC7L3        | MIMAT0022692 | hsa-miR-181b-3p | 1        | 0       | 0      | 0       | 0         | 0          | 0         | 0         | 0       | 0          | 0         | 0        | 0    | 1    | 0          | 0         | 0       |
| ENSG000 | LUC7L3        | MIMAT0000257 | hsa-miR-181b-5p | 1        | 0       | 0      | 0       | 0         | 1          | 0         | 0         | 0       | 0          | 0         | 0        | 0    | 0    | 0          | 0         | 0       |
| ENSG000 | MCM9          | MIMAT0000256 | hsa-miR-181a-5p | 2        | 0       | 0      | 0       | 0         | 0          | 1         | 0         | 1       | 0          | 0         | 0        | 0    | 0    | 0          | 0         | 0       |
| ENSG000 | MCM9          | MIMAT0000257 | hsa-miR-181b-5p | 2        | 0       | 0      | 0       | 0         | 1          | 0         | 1         | 0       | 0          | 0         | 0        | 0    | 0    | 0          | 0         | 0       |
| ENSG000 | MEAF6         | MIMAT0000256 | hsa-miR-181a-5p | 3        | 0       | 0      | 0       | 0         | 1          | 0         | 0         | 0       | 0          | 0         | 1        | 0    | 1    | 0          | 0         | 0       |
| ENSG000 | MEAF6         | MIMAT0022692 | hsa-miR-181b-3p | 1        | 0       | 0      | 0       | 0         | 0          | 0         | 0         | 0       | 0          | 0         | 0        | 0    | 1    | 0          | 0         | 0       |
| ENSG000 | MEAF6         | MIMAT0000257 | hsa-miR-181b-5p | 3        | 0       | 0      | 0       | 0         | 1          | 0         | 0         | 0       | 0          | 0         | 1        | 0    | 1    | 0          | 0         | 0       |
| ENSG000 | MED8          | MIMAT0000256 | hsa-miR-181a-5p | 4        | 0       | 0      | 0       | 0         | 1          | 0         | 0         | 0       | 0          | 0         | 1        | 1    | 1    | 0          | 0         | 0       |
| ENSG000 | MED8          | MIMAT0000257 | hsa-miR-181b-5p | 4        | 0       | 0      | 0       | 0         | 1          | 0         | 0         | 0       | 0          | 0         | 1        | 1    | 1    | 0          | 0         | 0       |
| ENSG000 | METTL16       | MIMAT0000270 | hsa-miR-181a-3p | 1        | 0       | 0      | 0       | 0         | 0          | 0         | 0         | 0       | 0          | 0         | 0        | 0    | 1    | 0          | 0         | 0       |
| ENSG000 | MFS06         | MIMAT0000256 | hsa-miR-181a-5p | 3        | 0       | 0      | 0       | 0         | 1          | 0         | 0         | 0       | 0          | 0         | 1        | 0    | 1    | 0          | 0         | 0       |
| ENSG000 | MFS06         | MIMAT0000257 | hsa-miR-181b-5p | 3        | 0       | 0      | 0       | 0         | 1          | 0         | 0         | 0       | 0          | 0         | 1        | 0    | 1    | 0          | 0         | 0       |
| ENSG000 | PLEKHJ1       | MIMAT0000256 | hsa-miR-181a-5p | 3        | 0       | 0      | 0       | 0         | 1          | 0         | 0         | 0       | 0          | 0         | 1        | 0    | 1    | 0          | 0         | 0       |
| ENSG000 | PLEKHJ1       | MIMAT0000257 | hsa-miR-181b-5p | 3        | 0       | 0      | 0       | 0         | 1          | 0         | 0         | 0       | 0          | 0         | 1        | 0    | 1    | 0          | 0         | 0       |
| ENSG000 | PROSC         | MIMAT0000256 | hsa-miR-181a-5p | 0        | 1       | 0      | 0       | 0         | 0          | 0         | 0         | 0       | 0          | 0         | 0        | 0    | 0    | 0          | 0         | 1       |
| ENSG000 | PROSC         | MIMAT0022692 | hsa-miR-181b-3p | 1        | 0       | 0      | 0       | 0         | 0          | 0         | 0         | 0       | 0          | 0         | 0        | 0    | 1    | 0          | 0         | 0       |
| ENSG000 | PRUNE         | MIMAT0000270 | hsa-miR-181a-3p | 2        | 0       | 0      | 0       | 0         | 0          | 1         | 0         | 0       | 0          | 0         | 0        | 0    | 1    | 0          | 0         | 0       |
| ENSG000 | PRUNE         | MIMAT0000256 | hsa-miR-181a-5p | 1        | 0       | 0      | 0       | 0         | 1          | 0         | 0         | 0       | 0          | 0         | 0        | 0    | 0    | 0          | 0         | 0       |
| ENSG000 | RBBP7         | MIMAT0000256 | hsa-miR-181a-5p | 5        | 0       | 0      | 0       | 0         | 1          | 0         | 1         | 0       | 0          | 0         | 1        | 1    | 1    | 0          | 0         | 0       |
| ENSG000 | RBBP7         | MIMAT0000257 | hsa-miR-181b-5p | 5        | 0       | 0      | 0       | 0         | 1          | 0         | 1         | 0       | 0          | 0         | 1        | 1    | 1    | 0          | 0         | 0       |
| ENSG000 | SCG2          | MIMAT0000257 | hsa-miR-181b-5p | 1        | 0       | 0      | 0       | 0         | 1          | 0         | 0         | 0       | 0          | 0         | 0        | 0    | 0    | 0          | 0         | 0       |
| ENSG000 | SCOC          | MIMAT0000256 | hsa-miR-181a-5p | 4        | 0       | 0      | 0       | 0         | 1          | 0         | 0         | 0       | 0          | 0         | 1        | 1    | 1    | 0          | 0         | 0       |
| ENSG000 | SCOC          | MIMAT0000257 | hsa-miR-181b-5p | 4        | 0       | 0      | 0       | 0         | 1          | 0         | 0         | 0       | 0          | 0         | 1        | 1    | 1    | 0          | 0         | 0       |
| ENSG000 | SMYD4         | MIMAT0022692 | hsa-miR-181b-3p | 1        | 0       | 0      | 0       | 0         | 0          | 0         | 0         | 0       | 0          | 0         | 0        | 0    | 1    | 0          | 0         | 0       |
| ENSG000 | SMYD4         | MIMAT0000257 | hsa-miR-181b-5p | 1        | 0       | 0      | 0       | 0         | 1          | 0         | 0         | 0       | 0          | 0         | 0        | 0    | 0    | 0          | 0         | 0       |
| ENSG000 | ST7           | MIMAT0000256 | hsa-miR-181a-5p | 1        | 0       | 0      | 0       | 0         | 0          | 0         | 1         | 0       | 0          | 0         | 0        | 0    | 0    | 0          | 0         | 0       |
| ENSG000 | ST7           | MIMAT0000257 | hsa-miR-181b-5p | 1        | 0       | 0      | 0       | 0         | 0          | 0         | 1         | 0       | 0          | 0         | 0        | 0    | 0    | 0          | 0         | 0       |
| ENSG000 | TLE4          | MIMAT0000256 | hsa-miR-181a-5p | 1        | 0       | 0      | 0       | 0         | 1          | 0         | 0         | 0       | 0          | 0         | 0        | 0    | 0    | 0          | 0         | 0       |
| ENSG000 | TLE4          | MIMAT0000257 | hsa-miR-181b-5p | 1        | 0       | 0      | 0       | 0         | 1          | 0         | 0         | 0       | 0          | 0         | 0        | 0    | 0    | 0          | 0         | 0       |
| ENSG000 | TRIM37        | MIMAT0000270 | hsa-miR-181a-3p | 1        | 0       | 0      | 0       | 0         | 0          | 0         | 0         | 0       | 0          | 0         | 0        | 0    | 1    | 0          | 0         | 0       |
| ENSG000 | ZDHHC15       | MIMAT0000256 | hsa-miR-181a-5p | 2        | 0       | 0      | 0       | 0         | 1          | 0         | 1         | 0       | 0          | 0         | 0        | 0    | 0    | 0          | 0         | 0       |
| ENSG000 | ZDHHC15       | MIMAT0022692 | hsa-miR-181b-3p | 1        | 0       | 0      | 0       | 0         | 0          | 0         | 0         | 0       | 0          | 0         | 0        | 0    | 1    | 0          | 0         | 0       |
| ENSG000 | ZDHHC15       | MIMAT0000257 | hsa-miR-181b-5p | 1        | 0       | 0      | 0       | 0         | 0          | 0         | 1         | 0       | 0          | 0         | 0        | 0    | 0    | 0          | 0         | 0       |
| ENSG000 | ZNF367        | MIMAT0000256 | hsa-miR-181a-5p | 2        | 0       | 0      | 0       | 0         | 1          | 0         | 1         | 0       | 0          | 0         | 0        | 0    | 0    | 0          | 0         | 0       |
| ENSG000 | ZNF367        | MIMAT0000257 | hsa-miR-181b-5p | 1        | 0       | 0      | 0       | 0         | 0          | 0         | 1         | 0       | 0          | 0         | 0        | 0    | 0    | 0          | 0         | 0       |

**Suppl. Table 3 (related to Figure 10).** Human genes predicted to contain a seed sequence for *mir181ab1*.

## SUPPLEMENTARY METHODS

Mouse work. Genotyping was done on DNA extracted from tail clipping. Mice were intratracheally administered a dose of  $5 \times 10^6$  pfu of adCre and lungs harvested 20 weeks after infection. For tumor maintenance experiments, mice were administered tamoxifen (2 mg/100  $\mu$ l) at the age of 8 weeks on 3 consecutive days, and lungs harvested 8 weeks later. Blinding analyses were carried out when tumor burden, tumor number or tumor size was scored in the genetic experiment. Score of immunohistochemistry analyses was also blinded. For tumor formation assays,  $5 \times 10^4$  *Kras*<sup>LA2</sup>; *Rosa26Cre*<sup>ERT2</sup>; *Mir181*<sup>flox/flox</sup> mouse lung cancer cells (KLA), previously treated for 2 days with adCre or adEmpty, were suspended in serum free DMEM and injected subcutaneously into the lower flanks of Rag2<sup>-/-</sup> mice (Charles River).

For pancreatic cancer initiation studies *Ptf1a*<sup>Cre/+</sup>; *Kras*<sup>LSL-G12D/+</sup> and *Ptf1a*<sup>Cre/+</sup>; *Kras*<sup>LSL-G12D/+</sup>; *Mir181ab1*<sup>flox/flox</sup> mice were analyzed at 6 month of age. For survival studies, *Ptf1a*<sup>Cre/+</sup>; *Kras*<sup>LSL-G12D/+</sup>; *Trp53*<sup>flox/flox</sup> and *Ptf1a*<sup>Cre/+</sup>; *Kras*<sup>LSL-G12D/+</sup>; *Trp53*<sup>flox/flox</sup>; *Mir181ab1*<sup>flox/flox</sup> mice were used and followed for signs of disease progression. Histopathological analysis was based on the classification consensus (73). Two stage tumorigenesis experiments were performed using *Kras*<sup>FSF-G12D/+</sup>; *Rosa26*<sup>FSF-CreERT2</sup> (74), *Trp53*<sup>FRT/FRT</sup> and *Mir181ab1*<sup>flox/flox</sup> mutant mice. Tumors were induced by replication-deficient adenoviruses expressing Cre-recombinase (ad-Cre) delivered by intrapancreatic duct injection, as previously described (45, 75). Briefly, 8 to 10-week old *Kras* *Kras*<sup>FSF-G12D/+</sup>; *Trp53*<sup>FRT/FRT</sup>; *Rosa26*<sup>FSF-CreERT2</sup>; *Mir181ab1*<sup>flox/flox</sup> were injected with 100  $\mu$ l of  $5 \times 10^6$  PFU Ad-Cre solution (Baylor College of Medicine, Viral Vector Production Core) into the common bile duct adjacent to the duodenum. Next, tumors were resected and isolated cancer cells ( $0.5 \times 10^6$ ) were mixed with matrigel (1:1) and transplanted to the flanks of NSG mice (NOD.SCID-IL2Rg<sup>-/-</sup>) were utilized for PanIN transplantation studies. Tumor volume was calculated every three days. Once the tumors reached 150 mm<sup>3</sup> mice were subjected to three (administered every other day) intraperitoneally injections of tamoxifen (1 mg/mouse) or vehicle control (corn oil) to induce *Mir181ab1* gene deletion.

Tumor dimensions were measured twice a week and tumor volume was calculated using  $\text{Volume} = \pi/6 \times (\text{length}) \times (\text{width})^2$ .

Cell cycle assay. Cell cycle analysis was carried out with Click-iT® EdU Flow Cytometry Assay Kit (Invitrogen). Cells were seeded, treated with adCre for 48 h and cultured for additional 72 or 96 h with fresh medium. At the indicated time points, cells were treated following manufacturer's instructions. Cells were assessed with



FACSCanto II cytometer (BD Biosciences). Data were analyzed using FlowJo® software v9.3.

Pharmacological screen. KLA wt/wt and mut/mut cells pretreated with adCre for 48 h and seeded in 96-well plates. After overnight culture, different doses (previously established in pilot studies) of trametinib (MEKi), AZ08055 (mTORi), GSK2126458 (PI3Ki), alisertib (AURKai), barasertib (AURKBi), pacritinib (JAK2/FLT3i), NVP-BEZ235 (Pi3K/mTORi), BI-2536 (PLK1i), neratinib (EGFR/HER2i), JQ1 (BRDi), CP673451 (PDGFRi), FGFRi, palbociclib (CDK4/6i), fredatinib (JAK2i), apicidin (HDACi), panobinostat (HDACi), IKK16 (IKB/IKKi), SP600125 (JNKi), BIX02189 (MEK5i) or dasatinib (BCR-ABL/SRC/c-KITi). All inhibitors were purchased from Selleck.

Pharmacological inhibitor treatment. KLA and KPC cells were treated with trametinib (MEKi, 10  $\mu$ M), BIX02189 (MEK5i, 10  $\mu$ M), SP600125 (JNKi, 20  $\mu$ M), GSK2126458 (Pi3Ki, 0.1  $\mu$ M), SB203580 (p38i, 20  $\mu$ M), IKK-16 (IKKi, 1  $\mu$ M), and LY294002 (AKTi, 10  $\mu$ M) for 3 and 12 h. RNA was extracted at indicated time points and miR181a and miR181b expression was assessed by qPCR.

Western blot. Cells were seeded in 60 mm dishes, scrapped and lysed using a lysis buffer containing 1% NP-40, 150 mM NaCl, 50 mM Tris pH 7.4, 1 mM EDTA, 1% glycerol, supplemented with protease inhibitor cocktail (Roche), 0.5 M sodium fluoride and 200 mM sodium orthovanadate. 20  $\mu$ g of protein samples were resolved by SDS PAGE and transferred to a nitrocellulose membrane (Bio-Rad). Membranes were blocked with 5% milk PBS-T for 1 h at room temperature. Primary antibodies were incubated overnight at 4° C and secondary antibodies were incubated for 1 h at room temperature. SuperSignal™ West Pico PLUS Chemiluminescent Substrate (34580; Thermo Scientific) or Lumigen ECL Ultra (TMA-100; Lumigen) and the Gel Imaging System (Bio-Rad) were used for protein detection and bands were quantified using ImageJ software.

RNA sequencing analysis. Raw fastq files were trimmed with Trimmomatic/0.36 and reads were aligned to the mm10 reference genome with STAR/2.5.1b aligner. Gene level counts were determined with STAR *–quantMode* option using gene annotations from GENCODE (vM13). QC assessments such as unique alignment counts, unique/multiple ratio or exon/intron ratio was derived with ngsutilsj-0.3-2180ca6 using the *bam-stats* option. Differential gene expression and all other pathway analysis are conducted with R/3.4.3. Samples were imported, normalized with trimmed mean of M-values (TMM) from the EdgeR/3.20.9 package and further transformed with VROOM from the Limma/3.34.9 package, resulting in a log2 normalized count matrix. A linear

model using the Limma/3.34.9 package was then used to obtain p-values, adjusted p-values and log-fold changes (LogFC).

Prediction of potential miR181ab1 targets. Genes downregulated upon exogenous miR181ab1 expression were analyzed based on target prediction databases. The following databases were used for target prediction: TargetScan release 5.1 (3), PicTar (4), PITA release 6 (5), miranda release sept2008 (6), microcosm release 5 (7) and loRNA database (8). All these information and validated miRNA targets were used with the methods developed in (8).

## SPECIFIC MATERIAL INFORMATION

| REAGENT                  | SOURCE                          | IDENTIFIER      |
|--------------------------|---------------------------------|-----------------|
| Antibodies               |                                 |                 |
| MUC5AC                   | Thermo Fisher Scientific        | Cat# 145P1      |
| Ki67                     | BD Bioscience                   | Cat# 550609     |
| Cleaved Caspase 3        | Cell Signaling Technologies     | Cat# 9664       |
| anti-Mouse Biotinylated  | IgG Cell Signaling Technologies | Cat# 14709      |
| anti-Rabbit Biotinylated | IgG Cell Signaling Technologies | Cat# 14708      |
| Phospho-H3               | Cell Signaling Technologies     | Cat# 9701       |
| KRAS                     | Calbiochem                      | Cat# OP24-100M6 |
| RASSF1A                  | eBioscience                     | Cat# 14-6888-82 |
| $\beta$ -TUBULIN         | Sigma                           | Cat# T4026      |
| HSP90                    | Santa Cruz Biotechnologies      | Cat# SC-69703   |

### Bacterial and Virus Strains

|                  |                                                          |                    |
|------------------|----------------------------------------------------------|--------------------|
| Adenovirus-Cre   | Baylor College of Medicine, Viral Vector Production Core | Cat# Ad-Cre        |
| Adenovirus-Cre   | Iowa University                                          | Cat# Ad5-CMV Cre   |
| Adenovirus-Empty | Iowa University                                          | Cat# Ad5-CMV Empty |

### Plasmids

|                                           |                            |                                           |
|-------------------------------------------|----------------------------|-------------------------------------------|
| pMWX mir181wt/wt, wt/mut, mut/wt, mut/mut | (9)                        |                                           |
| pX333                                     | A gift from Andrea Ventura | Addgene plasmid # 64073 ;                 |
| pMAX GFP                                  | Lonza                      |                                           |
| pLenti6-CMV KRASG12D                      | This study                 | Mutant KRAS from Ras initiative (Addgene) |
| psiCHECK™-2                               | Promega                    |                                           |
| pSIN-EF2-Nexmif-Puro                      | This study                 |                                           |

### Chemicals, Peptides, and Recombinant Proteins

|                   |                          |               |
|-------------------|--------------------------|---------------|
| Hydrogen Peroxide | Thermo Fisher Scientific | Cat# H325-500 |
| Tamoxifen         | Sigma-Aldrich            | Cat# T5648    |

|                                        |                          |                |
|----------------------------------------|--------------------------|----------------|
| 2-hydroxypropyl- $\beta$ -cyclodextrin | Sigma-Aldrich            | Cat# H107      |
| Bovine Serum Albumin (BSA)             | Thermo Fisher Scientific | Cat# BP9703100 |
| TRIzol                                 | Invitrogen               | Cat#15596026   |
| SYBRGreen                              | Applied Biosystems       | Cat#4309155    |

#### Critical Commercial Assays

|                                                                               |                           |                      |
|-------------------------------------------------------------------------------|---------------------------|----------------------|
| DAB Substrate Kit                                                             | Abcam                     | Cat# ab64238         |
| Vectastain ABC kit                                                            | Vector Laboratories       | Cat# PK-6100         |
| CellTiter 96 <sup>®</sup> Aqueous Non-Radiative Cell Proliferation Assay, MTS | Promega                   | Cat#G5421            |
| CellTiterGLO                                                                  | Promega                   | Cat#G7570            |
| DyNamo cDNA synthesis kit                                                     | F470, New England Biolabs | Cat#E6560S           |
| TaqMan MicroRNA Assay miR181a                                                 | Thermo Fisher Scientific  | Cat#4427975 ID000480 |
| TaqMan MicroRNA Assay miR181b                                                 | Thermo Fisher Scientific  | Cat#4427975 ID001098 |
| Click-iT <sup>®</sup> EdU Flow Cytometry Assay Kit                            | Invitrogen                | Cat#C10634           |
| Dual Luciferase Report Assay System                                           | Promega                   | Cat#E1910            |
| miRNA Northern Blot Assay Kit including 2 gels                                | Signosis                  | NB-0001              |

#### Primers

|                              |               |                                                                                        |
|------------------------------|---------------|----------------------------------------------------------------------------------------|
| mir181ab1 Genotyping         | Sigma-Aldrich | 1: taactgagaaaacctaagtgg<br>2: gggagcttagttacaggctg<br>3: tccctggaatcaagtctac          |
| sgRNA CRISPR/Cas9 miR181     | Sigma-Aldrich | 5'#1: cagtgaacattcaacgctgt<br>3'#2: tgtcgggtgggtgaactgtg<br>3'#4: ctgaacaatgaatgcaactg |
| miR181 KO CRISPR/Cas9 system | Sigma-Aldrich | Fw: tccatctctggaactagcccaa<br>Rev: ccagaagatgctgacgaattgga                             |
| mmu C77370                   | Sigma-Aldrich | Fw: ggataaccaacaagataaagtattgc<br>Rev: acttctggtcctctgagtcac                           |
| mmu Meaf6                    | Sigma-Aldrich | Fw: ctggccgagctggtaag<br>Rev: tctctccaagtttgcaagtgtt                                   |
| mmu Dek                      | Sigma-Aldrich | Fw: aaagccttctggcaaacat<br>Rev: ccagaactgttccgttcctt                                   |
| mmu Fbxo33                   | Sigma-Aldrich | Fw: gcatctactggagctggtgt<br>Rev: tccaaaagactaaactctggagat                              |
| mmu Mfsd6                    | Sigma-Aldrich | Fw: gccgtgctctgagatacaa<br>Rev: taggtgaggcggagtgagtt                                   |
| mmu Plekhj1                  | Sigma-Aldrich | Fw: agtggcccaggaagaacc<br>Rev: gctcttggtacagcattca                                     |
| mmu Med8                     | Sigma-Aldrich | Fw: atgccaggtgctccaaac<br>Rev: ttattccacttggcattttcc                                   |
| mmu Scoc                     | Sigma-Aldrich | Fw: tgaggcttctacccatcc                                                                 |

|           |               |                                                              |
|-----------|---------------|--------------------------------------------------------------|
|           |               | Rev: cctcgaacgccaactcttta                                    |
| mmu Rbbp7 | Sigma-Aldrich | Fw: acgcaagatggcgagtaaag<br>Rev: cagattttatactctctggtgatgaca |
| mmu Dtx4  | Sigma-Aldrich | Fw: ccggactgcaagaccatc<br>Rev: tgaagctcttcccaggattc          |
| mmu Cebpa | Sigma-Aldrich | Fw: caagaacagcaacgagtaccg<br>Rev: gtcactggtaactccagcac       |
| mmu Cebpb | Sigma-Aldrich | Fw: atcgacttcagcccctacct<br>Rev: tagtcgtcggcgaagagg          |
| mmu cMyb  | Sigma-Aldrich | Fw: agaccccgacacagcatcta<br>Rev: cagcagcccatcgtagtcat        |
| mmu Evi1  | Sigma-Aldrich | Fw: aagtaatgagtgtgcctatggc<br>Rev: agttgactctcgaagctcaaac    |
| mmu Meis1 | Sigma-Aldrich | Fw: gcaaagtatgccaggggagta<br>Rev: tctgtgttaagaaccgaggg       |
| mmu Gata2 | Sigma-Aldrich | Fw: caccgcccggtattgaatg<br>Rev: cctgcgagtcgagatgggtg         |
| mmu Gata3 | Sigma-Aldrich | Fw: aagctcagtatccgctgacg<br>Rev: gtttcgtagtaggacggggac       |
| Mmu Foxa2 | Sigma-Aldrich | Fw: tccgactggagcagctactac<br>Rev: gcgccacataggatgaca         |
| Hm GATA3  | Sigma-Aldrich | Fw: GCCCCTCATTAAGCCCAAG<br>Rev: TTGTGGTGGTCTGACAGTTCCG       |

#### Experimental Models: Cell Lines

|                                                  |               |               |
|--------------------------------------------------|---------------|---------------|
| KPC (mouse PDAC cell lines)                      | In this study | N/A           |
| KPCmiR181 <sup>-/-</sup> (mouse PDAC cell lines) | In this study | N/A           |
| KLA (mouse LUAD cell line)                       | In this study | N/A           |
| MEF                                              | In this study | N/A           |
| H6c7                                             | Kerafast      |               |
| 3KT                                              | (10)          |               |
| NCI-H2126                                        | ATCC          | Cat# CCL-256  |
| NCI-H1792                                        | ATCC          | Cat# CRL-5895 |

#### Experimental Models: Organisms/Strains

|                                             |                          |                |
|---------------------------------------------|--------------------------|----------------|
| Mouse: <i>Kras</i> <sup>LSL-G12D</sup>      | The Jackson Laboratories | Strain# 008179 |
| Mouse: <i>p53</i> <sup>lox/lox</sup>        | The Jackson Laboratories | Strain# 008462 |
| Mouse: <i>Ptf1a</i> <sup>Cre</sup>          | (Kawaguchi et al., 2002) | MGI# 2387812   |
| Mouse: <i>mir181</i> <sup>-/-</sup>         | (9)                      | N/A            |
| Mouse: <i>mir181</i> <sup>lox/lox</sup>     | (9)                      | N/A            |
| Mouse: <i>ROSA26</i> <sup>FSF-CreERT2</sup> | (11)                     | N/A            |
| Mouse: <i>Kras</i> <sup>FSF-G12D</sup>      | (11)                     | N/A            |
| Mouse: <i>Trp53</i> <sup>FRT/FRT</sup>      | (12)                     | MGI:5641750    |
| Mouse: <i>NOD.SCID-</i>                     | The Jackson Laboratories | Strain# 005557 |

## IL2Rg<sup>-/-</sup> (NSG)

### Software, Algorithms and Data bases

|                                               |                                                |                                                                                                               |
|-----------------------------------------------|------------------------------------------------|---------------------------------------------------------------------------------------------------------------|
| Prism 7                                       | GraphPad                                       | <a href="https://www.graphpad.com/">https://www.graphpad.com/</a> ; RRID:SCR_002798                           |
| Excel for Mac 2016                            | Microsoft                                      | <a href="https://www.microsoft.com/en-us/">https://www.microsoft.com/en-us/</a> ; RRID:SCR_016137             |
| Leica Application Suite X (LAS X)             | Leica                                          | <a href="https://www.leica-microsystems.com/">https://www.leica-microsystems.com/</a> RRID:SCR_013673         |
| ImageJ – Fiji package                         | Freeware                                       | <a href="http://fiji.sc">http://fiji.sc</a> ; RRID:SCR_002285                                                 |
| Flo-Jo                                        | V9.3                                           |                                                                                                               |
| Ingenuity Analysis                            | Pathway                                        | <a href="http://www.ingenuity.com">http://www.ingenuity.com</a>                                               |
| SPSS                                          | V13.0                                          |                                                                                                               |
| Horos                                         | GNU Lesser General Public License, Version 3.0 | <a href="https://www.horosproject.org/">https://www.horosproject.org/</a>                                     |
| LIMMA (Linear Models for Microarray Data)     | (1)                                            |                                                                                                               |
| R/bioconductor                                | (2)                                            |                                                                                                               |
| TargetScan release 5.1                        | (3)                                            |                                                                                                               |
| PicTar                                        | (4)                                            |                                                                                                               |
| PITA release 6                                | (5)                                            |                                                                                                               |
| miranda release sept2008                      | (6)                                            |                                                                                                               |
| microcosm release 5                           | (7)                                            |                                                                                                               |
| loRNA database                                | (8)                                            |                                                                                                               |
| The Cancer Genome Atlas (TCGA)                |                                                | <a href="https://tcga-data.nci.nih.gov/publications/tcga">https://tcga-data.nci.nih.gov/publications/tcga</a> |
| International Cancer Genome consortium (ICGC) | (13)                                           |                                                                                                               |

### Other

|                                |                          |                 |
|--------------------------------|--------------------------|-----------------|
| RPMI 1640 Medium               | Corning                  | Cat# MT10017CV  |
| DMEM Medium                    | Corning                  | Cat# MT10040CV  |
| Keratinocyte-SFM Medium        | Thermo Fisher Scientific | Cat# 17005042   |
| Fetal bovine serum             | Thermo Fisher Scientific | Cat# 10500056   |
| PBS                            | Corning                  | Cat# MT21031CV  |
| Trypsin-EDTA 0.25%             | Corning                  | Cat# MT25053CI  |
| Bovine Pituitary Extract (BPE) | Thermo Fisher Scientific | Cat# 13028014   |
| RBC Lysis Buffer               | Thermo Fisher Scientific | Cat# 00-4333-57 |
| Matrigel                       | Corning                  | Cat# 354234     |
| miR-181a-5p(HS)                | Signosis                 | HP-0081         |
| miR-181b-5p(HS)                | Signosis                 | HP-0082         |

## CONTACT FOR REAGENT AND RESOURCE SHARING

Further information and requests for resources and reagents should be directed to and will be fulfilled by the corresponding authors, Alejandro Sweet-Cordero ([Alejandro.Sweet-Cordero@ucsf.edu](mailto:Alejandro.Sweet-Cordero@ucsf.edu)) or Silvestre Vicent Cambra ([silvevicent@unav.es](mailto:silvevicent@unav.es)).

## SUPPLEMENTARY REFERENCES

1. Smyth GK. Linear models and empirical bayes methods for assessing differential expression in microarray experiments. *Stat Appl Genet Mol Biol*. 2004;3(Article3).
2. Gentleman RC, Carey VJ, Bates DM, Bolstad B, Dettling M, Dudoit S, Ellis B, Gautier L, Ge Y, Gentry J, et al. Bioconductor: open software development for computational biology and bioinformatics. *Genome Biol*. 2004;5(10):R80.
3. Friedman RC, Farh KK, Burge CB, and Bartel DP. Most mammalian mRNAs are conserved targets of microRNAs. *Genome Res*. 2009;19(1):92-105.
4. Lall S, Grun D, Krek A, Chen K, Wang Y-L, Dewey CN, Sood P, Colombo T, Bray N, Macmenamin P, et al. A genome-wide map of conserved microRNA targets in *C. elegans*. *Current biology : CB*. 2006;16(5):460-71.
5. Kertesz M, Iovino N, Unnerstall U, Gaul U, and Segal E. The role of site accessibility in microRNA target recognition. *Nature genetics*. 2007;39(10):1278-84.
6. Betel D, Koppal A, Agius P, Sander C, and Leslie C. Comprehensive modeling of microRNA targets predicts functional non-conserved and non-canonical sites. *Genome biology*. 2010;11(8):R90.
7. Griffiths-Jones S, Saini HK, van Dongen S, and Enright AJ. miRBase: tools for microRNA genomics. *Nucleic acids research*. 2008;36(Database issue):D154-8.
8. Guruceaga E, and Segura V. Functional interpretation of microRNA-mRNA association in biological systems using R. *Comput Biol Med*. 2014;44(124-31).
9. Fragoso R, Mao T, Wang S, Schaffert S, Gong X, Yue S, Luong R, Min H, Yashiro-Ohtani Y, Davis M, et al. Modulating the strength and threshold of NOTCH oncogenic signals by mir-181a-1/b-1. *PLoS Genet*. 2012;8(8):e1002855.
10. Sato M, Vaughan MB, Girard L, Peyton M, Lee W, Shames DS, Ramirez RD, Sunaga N, Gazdar AF, Shay JW, et al. Multiple oncogenic changes (K-RAS(V12), p53 knockdown, mutant EGFRs, p16 bypass, telomerase) are not sufficient to confer a full malignant phenotype on human bronchial epithelial cells. *Cancer Res*. 2006;66(4):2116-28.
11. Schonhuber N, Seidler B, Schuck K, Veltkamp C, Schachtler C, Zukowska M, Eser S, Feyerabend TB, Paul MC, Eser P, et al. A next-generation dual-recombinase system for time- and host-specific targeting of pancreatic cancer. *Nature Medicine*. 2014;20(11):1340-7.
12. Lee CL, Moding EJ, Huang XF, Li YF, Woodlief LZ, Rodrigues RC, Ma Y, and Kirsch DG. Generation of primary tumors with Flp recombinase in FRT-flanked p53 mice. *Dis Model Mech*. 2012;5(3):397-402.

13. Bailey P, Chang DK, Nones K, Johns AL, Patch AM, Gingras MC, Miller DK, Christ AN, Bruxner TJC, Quinn MC, et al. Genomic analyses identify molecular subtypes of pancreatic cancer. *Nature*. 2016;531(7592):47-+.
